# Supplementary material for: Progerin impairs 3D genome organization and induces fragile telomeres by limiting the dNTP pools
Source: PubMed Central journal article supplement (PMC8222272; doi:10.1038/s41598-021-92631-z), 2021-06-23

## **Progerin impairs 3D genome organization and induces fragile telomeres by limiting the dNTP pools**

Anna Kychygina<sup>1,4</sup>, Marina Dall'Osto<sup>1</sup>, Joshua A. M. Allen<sup>2</sup>, Jean-Charles Cadoret<sup>3</sup>, Vincent Piras<sup>1</sup>, Hilda A. Pickett<sup>2</sup>, Laure Crabbe<sup>1\*</sup>

### **Affiliation:**

<sup>1</sup>Molecular, Cellular and Developmental biology department (MCD), Centre de Biologie Integrative (CBI), University of Toulouse, CNRS, UPS, 31062 Toulouse, France

<sup>2</sup>Telomere Length Regulation Unit, Children's Medical Research Institute, Faculty of Medicine and Health, University of Sydney, Westmead, NSW 2145, Australia.

<sup>3</sup>Université de Paris, CNRS, Institut Jacques-Monod, UMR7592, France.

<sup>4</sup>Toulouse Institute for Infectious and Inflammatory Diseases (Infinity), INSERM UMR1291, CNRS UMR5051, UT3, 31059 Toulouse, France

\*Corresponding author: [laure.crabbe@univ-tlse3.fr](mailto:laure.crabbe@univ-tlse3.fr)

<https://orcid.org/0000-0001-7764-3600>

### **Contents**

### **Supplementary Figures 1-6 and Legends**

# SUP. FIGURE 1

## A

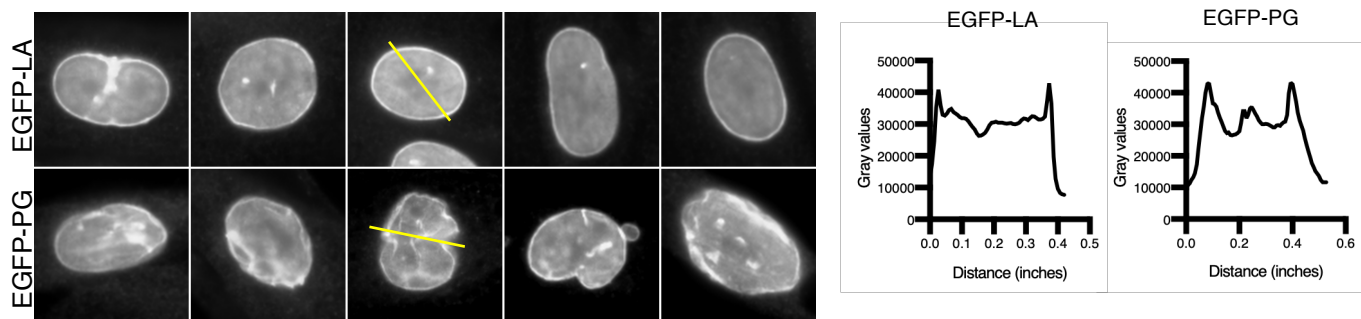

## B

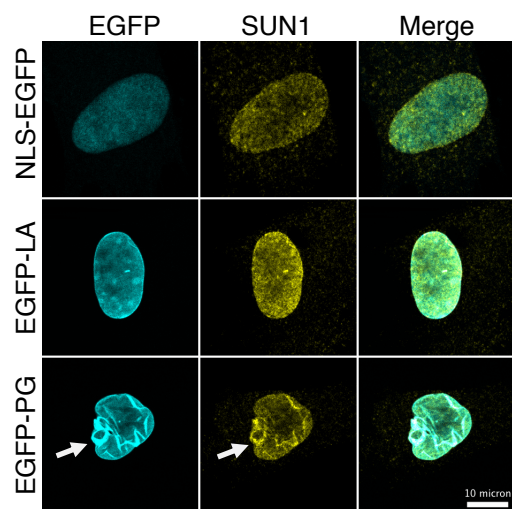

## C

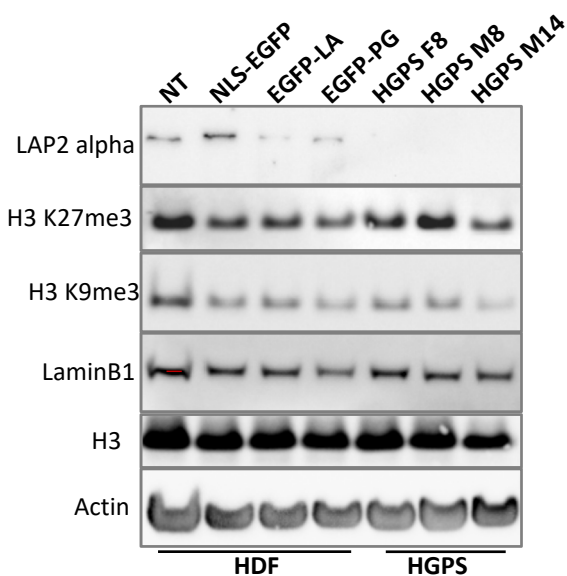

## D

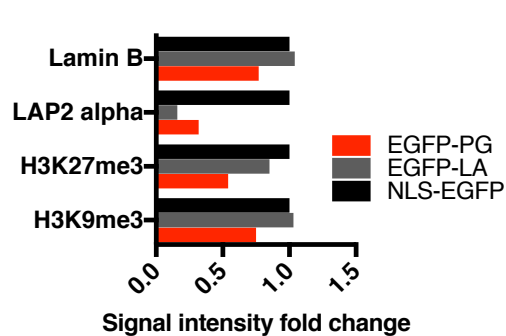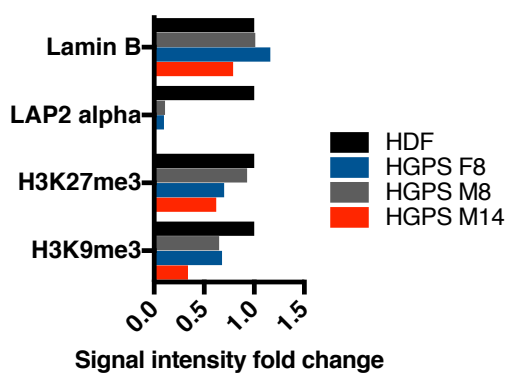

## E

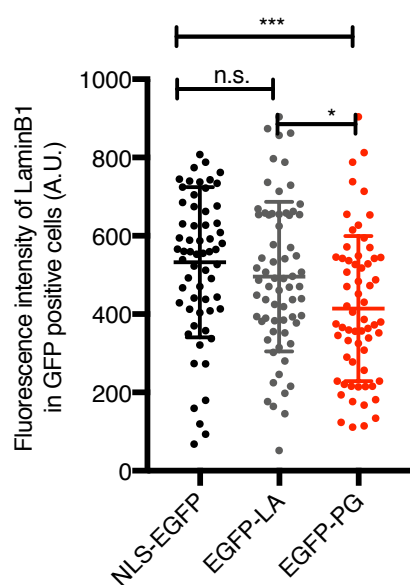

## F

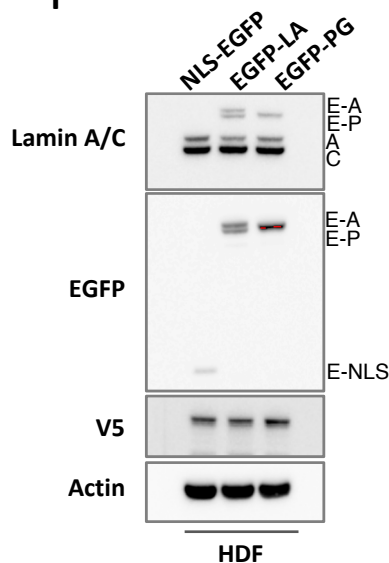

## G

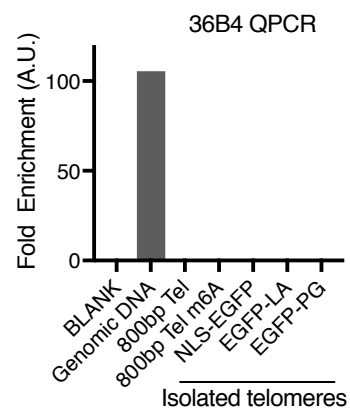

## Supplementary Figure 1. Related to Figure 1

A- Five representative confocal images (middle stack) of cells expressing EGFP-LA or EGFP-PG. Quantification of the grey values over the distance (yellow lines) is shown on the right. B- Representative immunostaining of HDF cells expressing the indicated constructs. EGFP (cyan), SUN1 (yellow), and merge. The arrows point to a region at the NE with accumulation of progerin and Sun1. Scale bar: 10mm. C- Western blots of whole cell extracts of the indicated cell lines. D- Quantification of (B). The graphs represent the signal intensity fold change using NLS-EGFP (left) or HDF (right) as a reference. E- Quantification of LaminB1 fluorescence intensity in HDF expressing NLS-EGFP, EGFP-LA, or EGFP-PG. Statistical significance was determined using Mann Whitney test (\* indicates  $p < 0.05$ , and \*\*\*  $p < 0.0005$ ). At least 60 nuclei were scored per cell line. F- Western blots of whole cell extracts of the indicated cell lines. The EGFP antibody detects bands corresponding to NLS-EGFP (E-NLS), EGFP-LA and EGFP-PG (E-A/E-P). The EGFP-LA sample presents two bands, most likely corresponding to pre-LaminA (expressed) and mature LaminA form after *in vivo* processing. The V5 antibody detect the M.EcoGII-LaminB construct. G- qPCR analyses of Mad1D using 36B4 primers to amplify a single genomic locus. The following templates were used: genomic DNA, a fragment of 800bp of telomeric repeats before or after *in vitro* methylation with M.EcoGII, and isolated telomeres from HDF expressing NLS-EGFP, EGFP-LA, or EGFP-PG as indicated.

## SUP. FIGURE 2

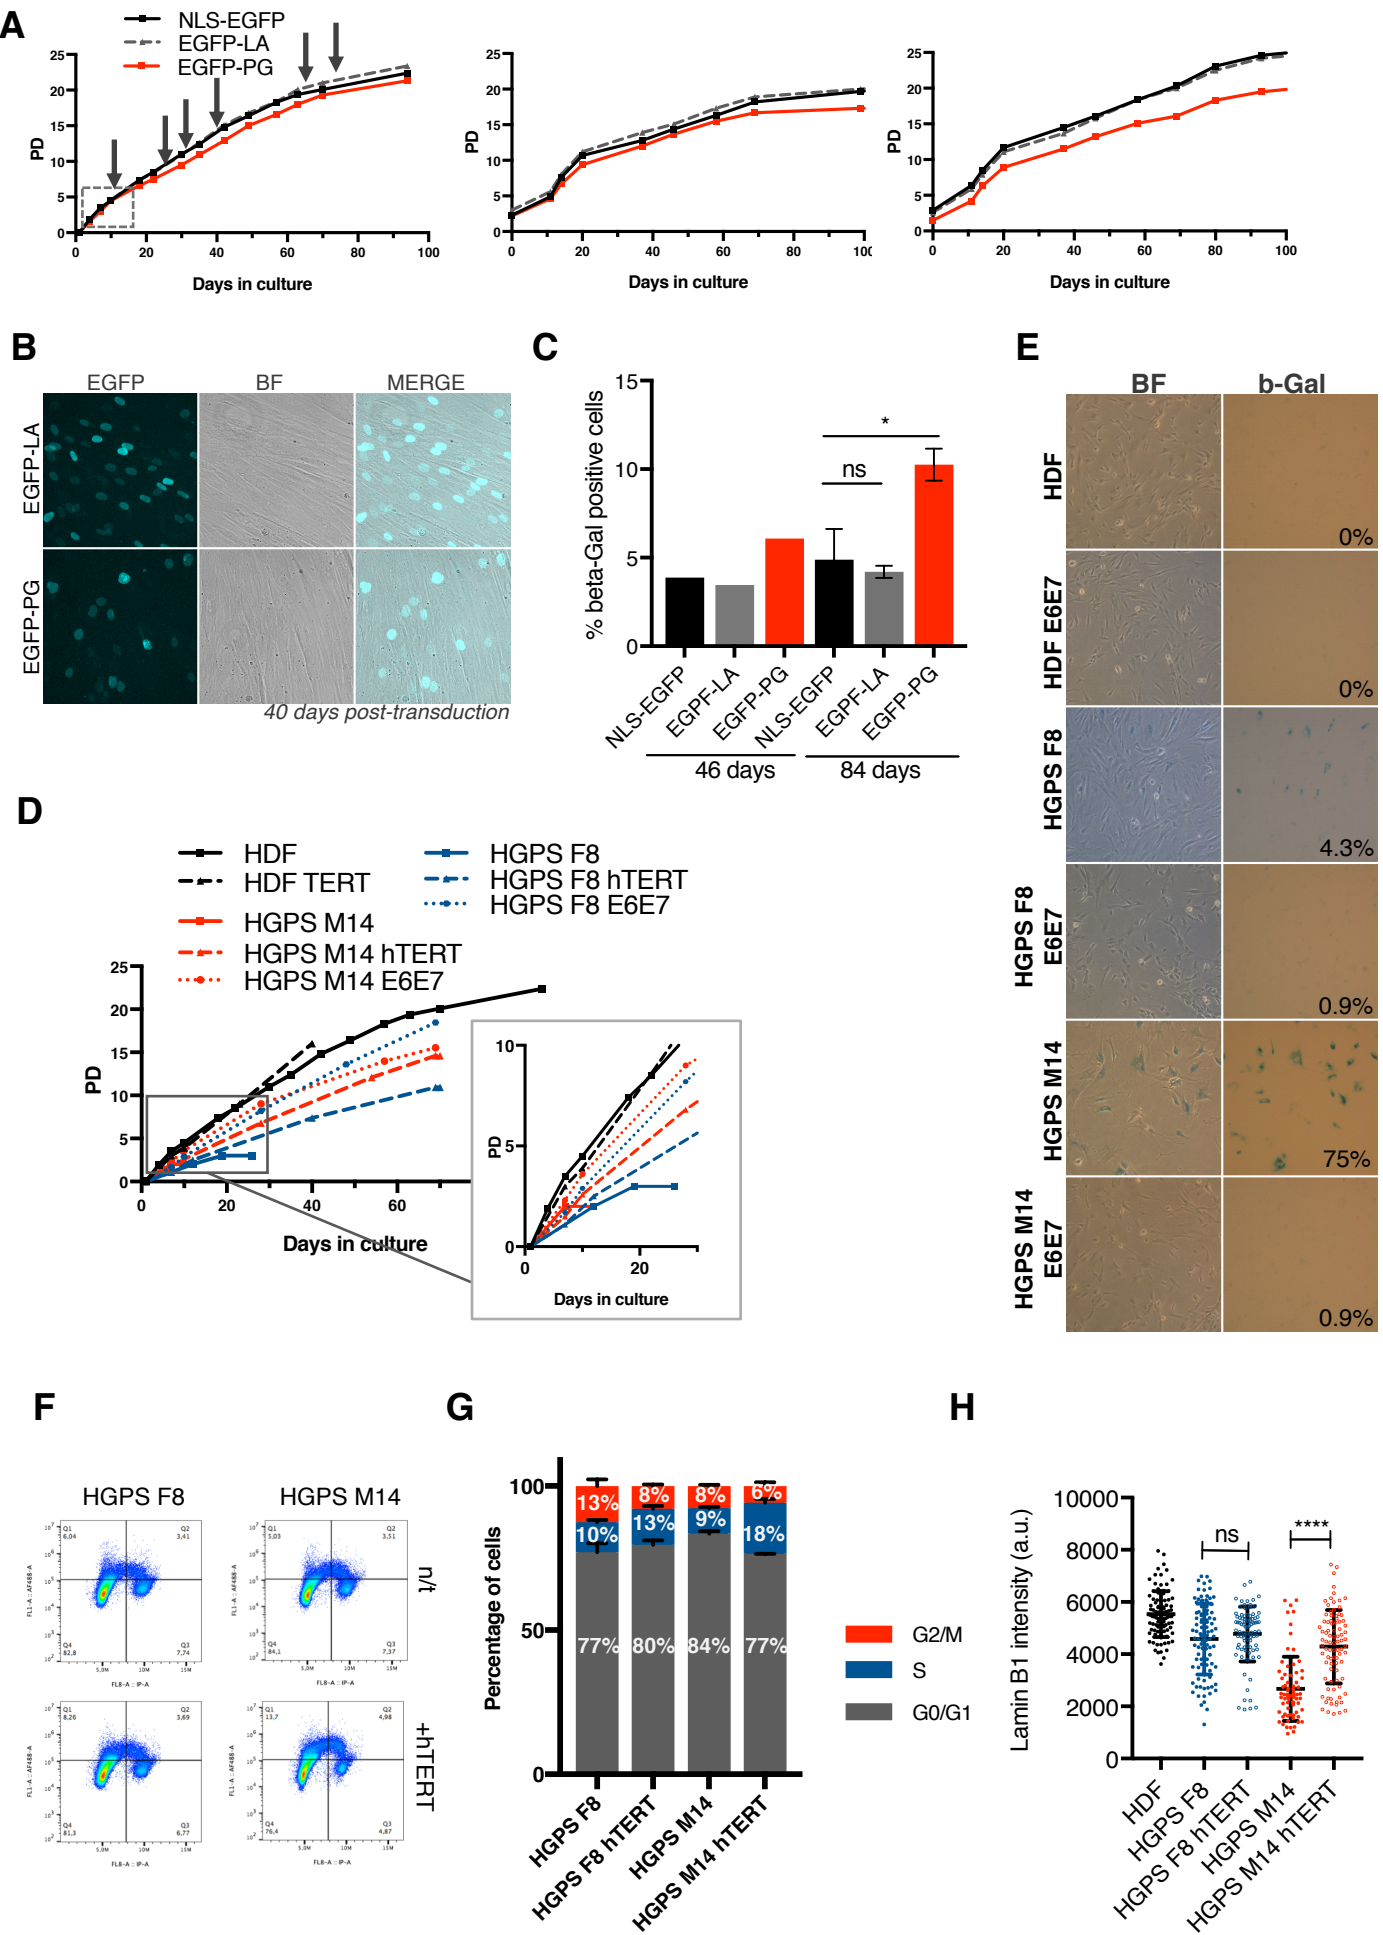



## Supplementary Figure 2. Related to Figure 2

A- Examples of growth curves of HDF expressing NLS-EGFP, EGFP-LA, or EGFP-PG. Each graph represents the cumulative population doublings (PD) as a function of days of growth. The arrows on the top graph point to the time of collection of cells for southern blots analyses shown in Fig. 2A. The dash square on the first graph highlights the first PDs were no difference in cell growth is observed between the different cell lines. B- Live HDF cells expressing EGFP-LA or EGFP-PG, 40 days post-transduction. The EGFP signal (cyan) is detected using a benchtop fluorescent microscope. C- Quantification of beta-galactosidase staining of cells in (A) 46 or 84 days after transduction. The graph represents the percentage of beta-galactosidase positive cells among the cell population. Statistical significance was determined using the one-way Anova test,  $n=2$  (\* indicates  $p<0.05$ ). D- Growth curves of the indicated cell lines. The graph represents the cumulative PDs as a function of days of growth. E- Beta-galactosidase staining of HDF and HGPS cells before or after E6E7 expression. The staining was performed on freshly grown cells. The percentage of beta-gal positive cells among the cell population in each condition is indicated,  $n=2$ . F- FACS profiles of propidium iodide (x-axis) and BrdU (y-axis) co-staining in the indicated cell lines. The percentage of cells in the different quadrants is indicated, with Q4 quadrant representing G0/G1, Q1-Q2 corresponding to S-phase and Q3 showing G2-M populations,  $n=2$ . G- Quantification of FACS profiles from (F). The percentage of cells in G0/G1, S and G2/M is shown. The BrdU signal was used to determine the percentage of cells in S phase. H- Quantification of LaminB1 intensity from immunostaining in the indicated cell lines. Mean+SD is shown,  $n=2$ . Statistical significance was determined using the Mann-Whitney test (\*\*\*\* indicates  $p<0.0001$ ).

### SUP. FIGURE 3

**A**

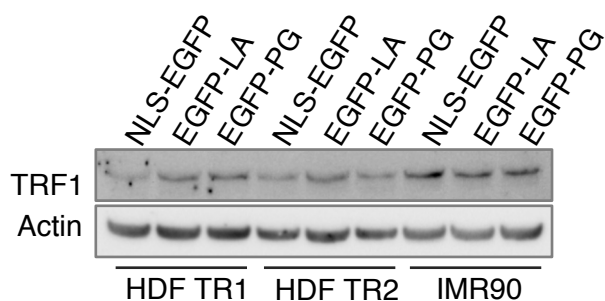

**B**

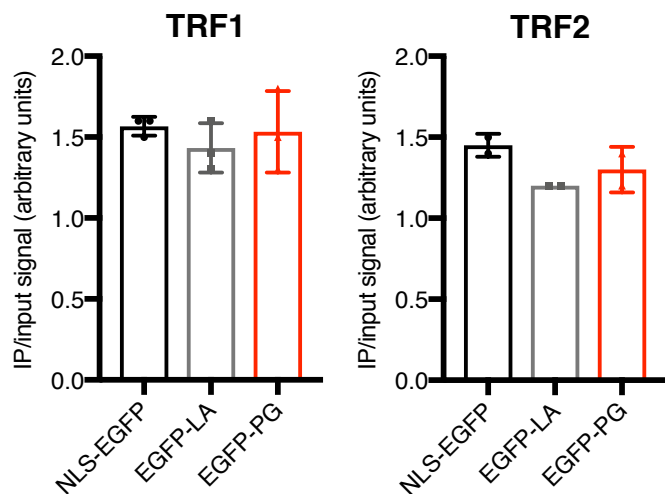

**C**

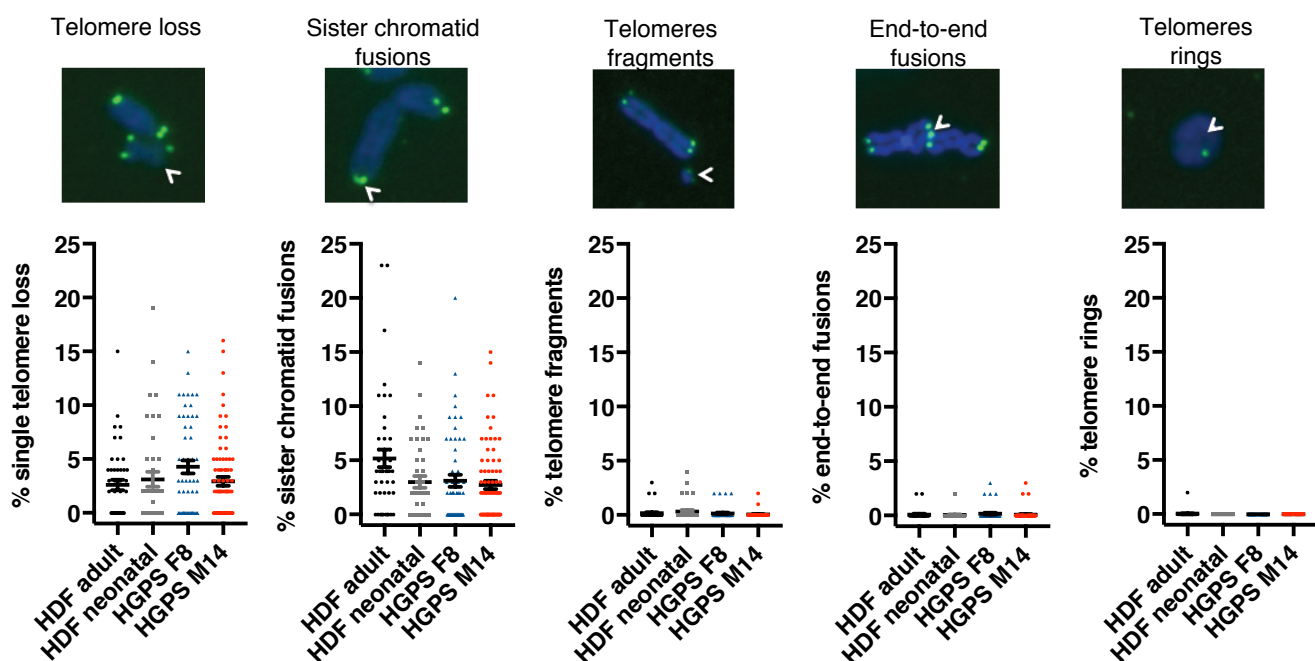

### Supplementary Figure 3. Related to Figure 3

A- Western blot of the indicated cell lines (TR1 and TRF2 are independent transductions). Anti-TRF1 and anti-Actin signals are shown. B- Quantification of ChIPs shown in Fig. 3B. Each graph represents the enrichment in the IP samples normalized to the INPUT material. Mean intensities are shown  $\pm$  SD (TRF1, n=3; TRF2, n=2 – except LA sample). C- Quantification of telomere aberrations (single telomere loss, sister chromatid fusion, telomere fragments, end-to-end fusions and telomere rings) scored on metaphase spreads from HGPS cells or controls as indicated. Telomeres were labeled by FISH with a FITC PNA probe. Representative images of each type of aberration are shown on top of each graph.

# SUP. FIGURE 4

## A

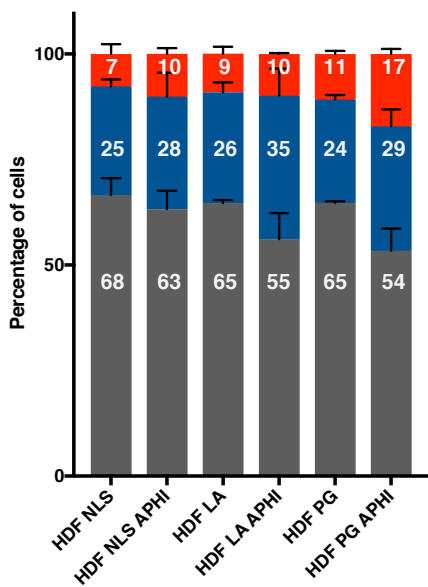

## B

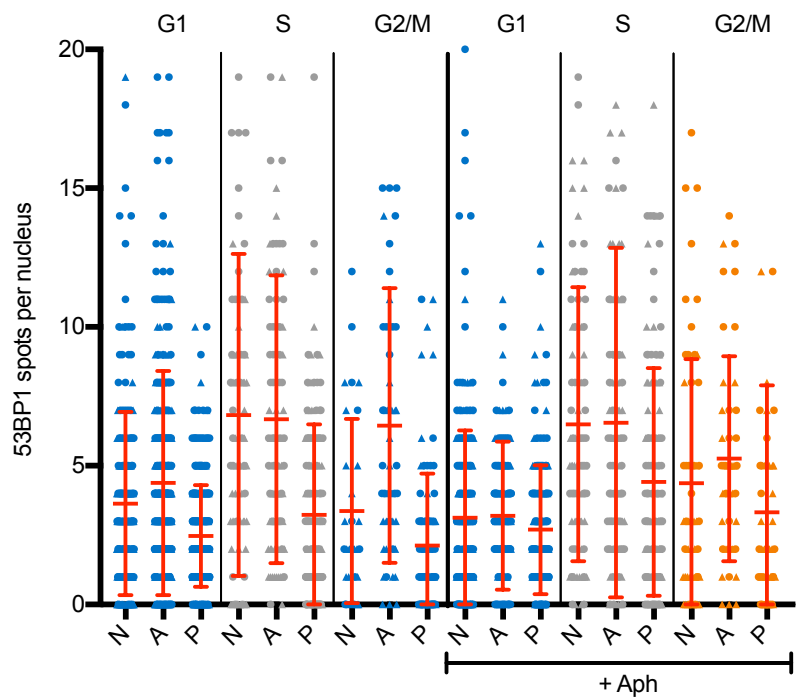

## C

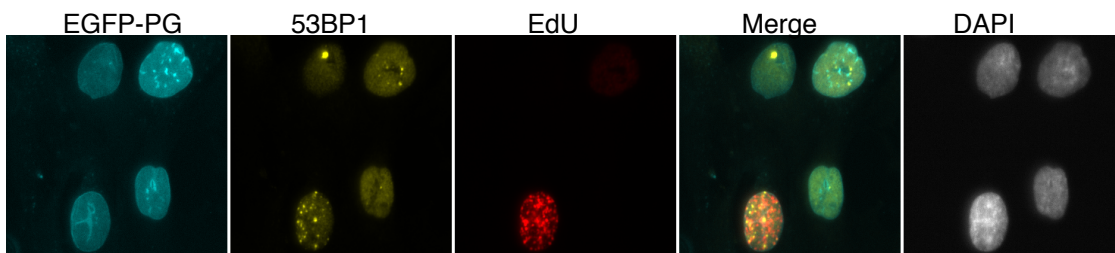

## D

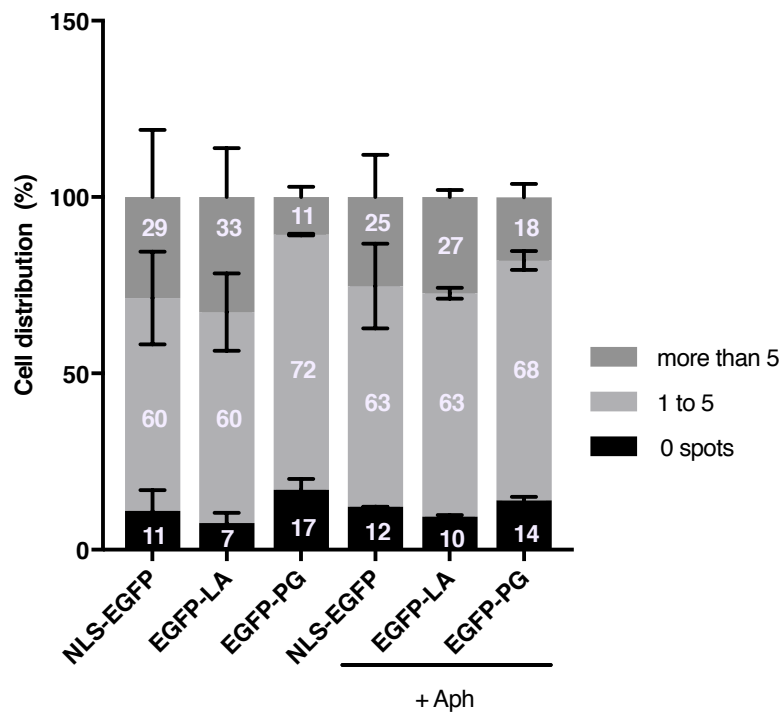

#### **Supplementary Figure 4. Related to Figure 4**

A- Quantification of the percentage of cells in G0/G1, S and G2/M obtained from QIBC experiments performed on HDF cells expressing NLS-EGFP, EGFP-LA or EGFP-PG, before or after 0.2mM aphidicolin treatment. The percentage of cells in each phase is indicated on the graph. B- Quantification of QIBC for 53BP1 staining performed on HDF expressing NLS-EGFP (N), EGFP-LA (A) or EGFP-PG (P), treated or not with 0.2mM of aphidicolin as in Fig 4E. Nuclei were sorted in G1, S and G2/M according to the DAPI and EdU signals. Mean with SD is shown, n=2. C- Representative immunostaining of HDF cells expressing EGFP-PG acquired on a wide field microscope. EGFP (cyan), 53BP1 (Yellow), EdU (red) and DAPI is shown. D- Same quantification as in B, but represented as a percentage of cells with 0, 1 to 5, or more than 5, 53BP1 spots per nucleus.

SUP. FIGURE 5

A

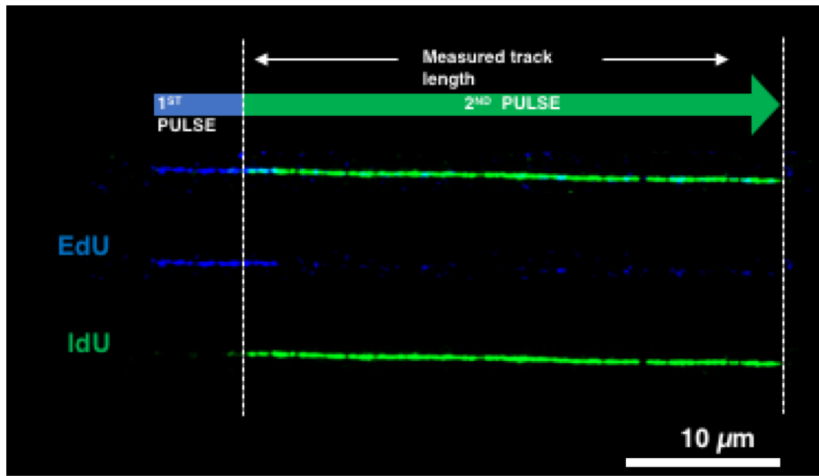

B

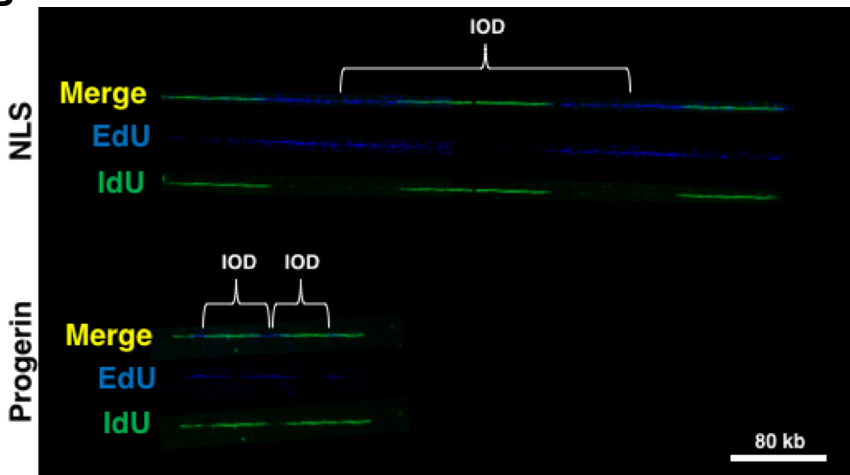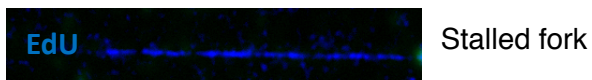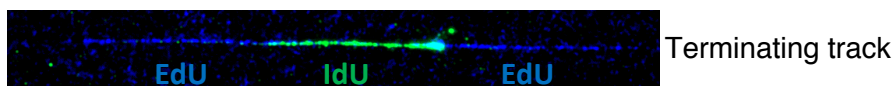

C

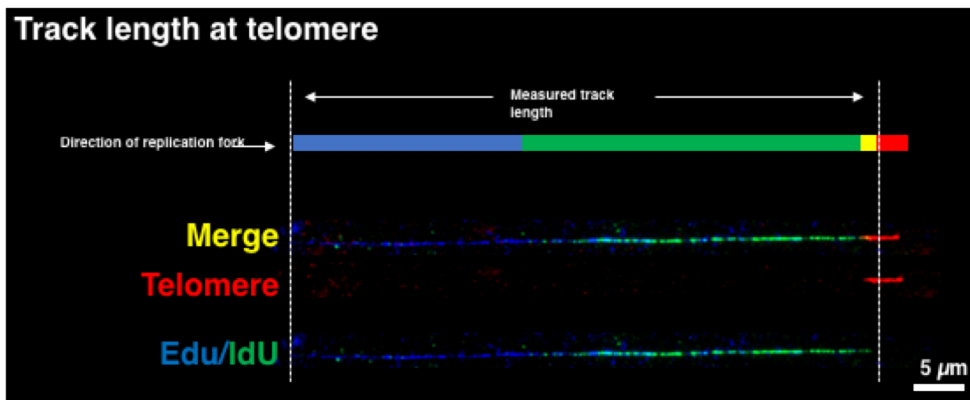

D

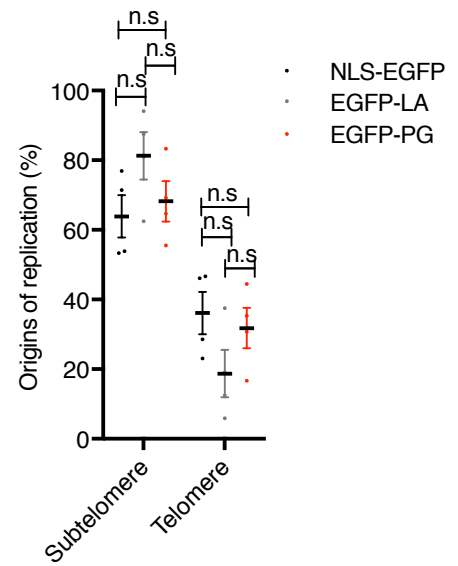

## Supplementary Figure 5. Related to Figure 5

A- Representative example of measured EdU and IdU tracks length for the SMARD analysis. B- Representative example of measured Inter Origin Distance (IOD) for the SMARD analysis. One example is shown for HDF expressing NLS-EGFP, and one example for EGFP-PG. Below: example of a stalled fork with only EdU staining (first pulse), and of a terminating track (IdU signal framed by EdU signal). C- Representative example of measured EdU and IdU tracks length at telomeres for the SMARD analysis. DNA fibers with a terminal telomeric FISH signal (red) preceded by EdU and/or IdU signals are used. D- Quantification of the percentage of origins of replication at telomeric and sub-telomeric regions in HDF cells expressing NLS-EGFP, EGFP-LA, or EGFP-PG. Mean with SED is show, n=3. Statistical significance was determined using one-way Anova test.

**SUP. FIGURE 6**

**A**

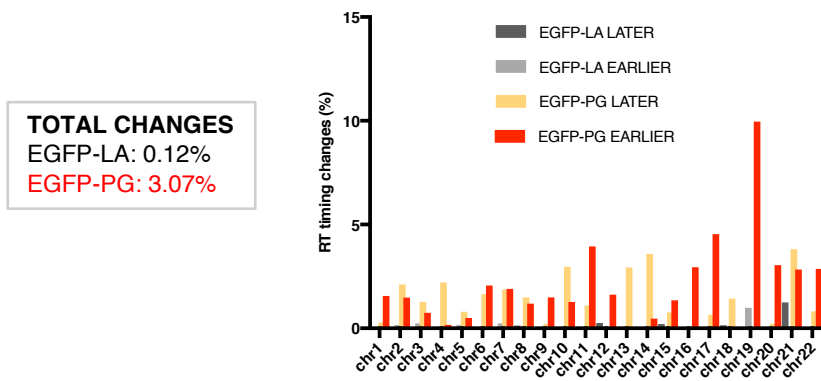

**B**

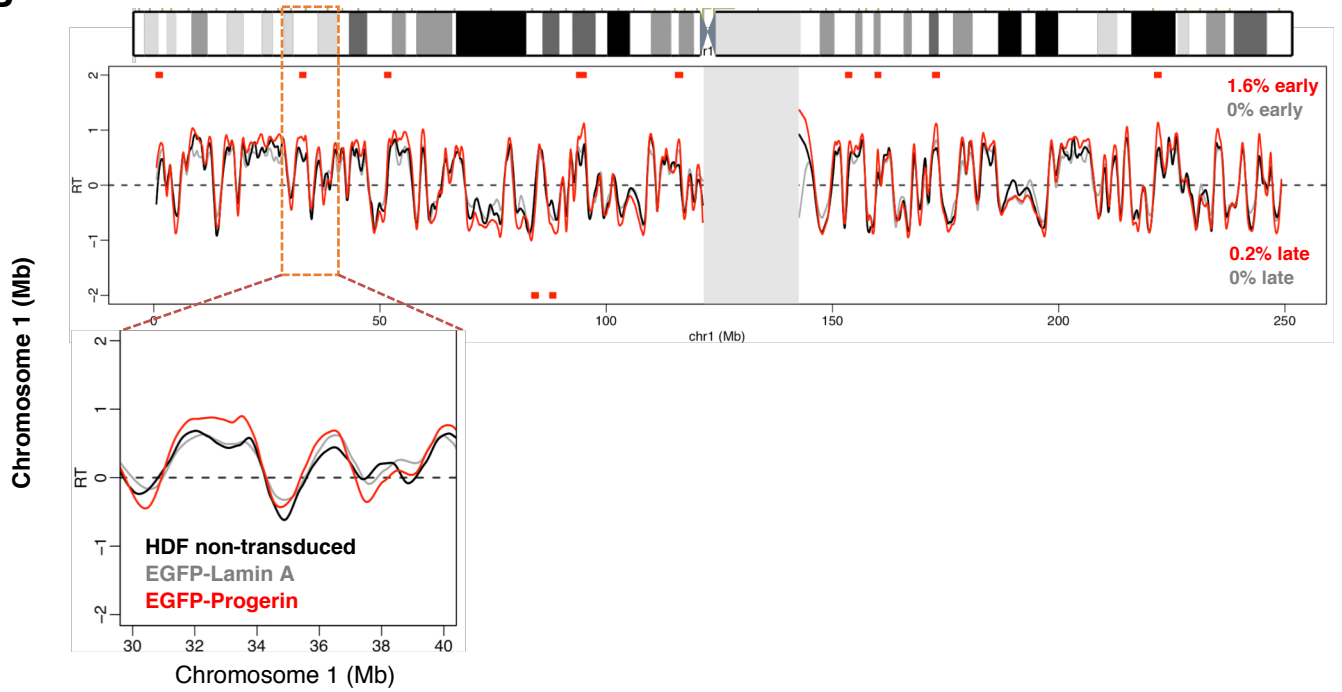

**C**

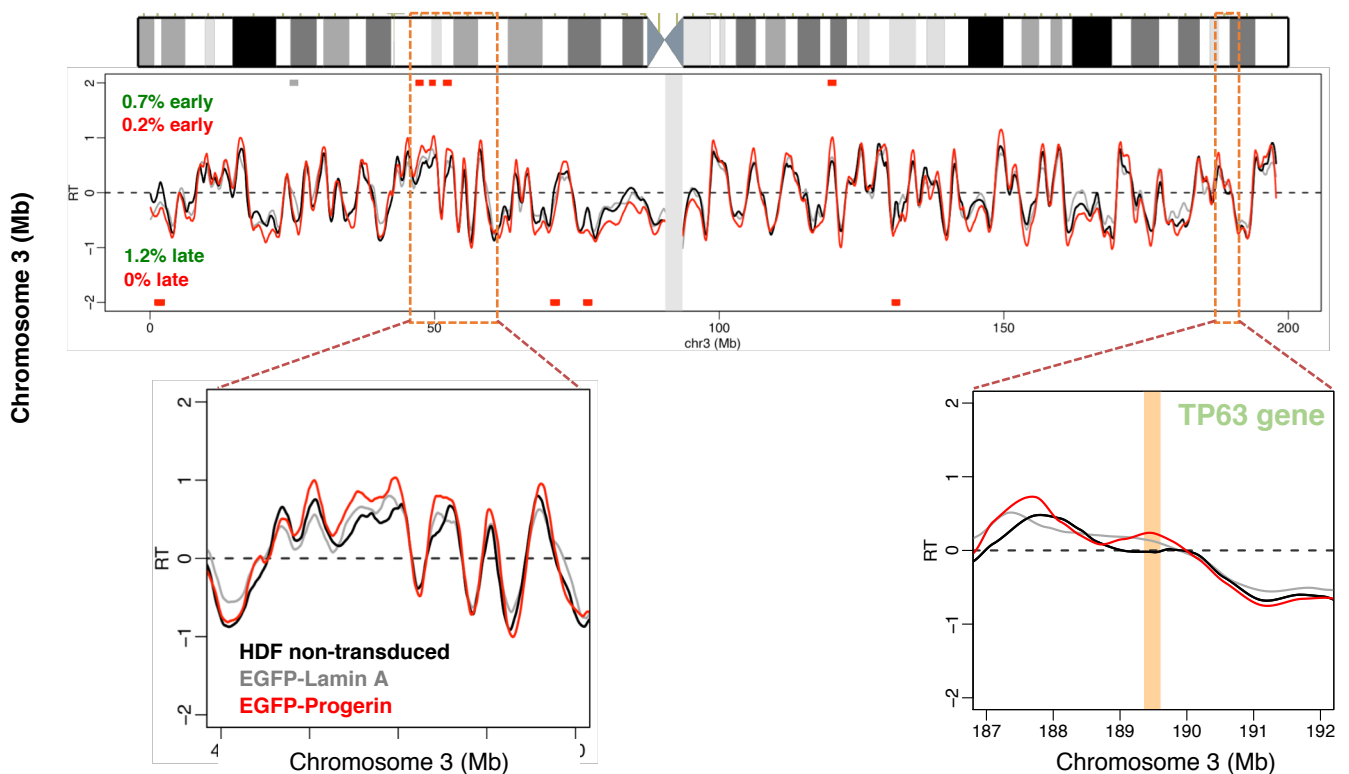



## Supplementary Figure 6. Related to Figure 6

A- Changes in RT profiles in HDFs expressing EGFP-LA or EGFP-PG compared to non-transduced cells. The graph represents changes to earlier or later timing for each chromosome. The percentage of total changes in the genome is also indicated. B&C- RT profiles of chromosome 1 (B) and 3 (C) for HDF cells non-transduced or expressing EGFP-LA or EGFP-PG. The graph displays the log<sub>2</sub> ratio of signals from early and late S-phase fractions. Positive values correspond to early replication, and negative values correspond to late replication. The magnified area highlights chromosome segments showing RT alterations in progerin-expressing cells. Region of the chromosome 3 corresponding to the *TP63* gene from Rivera-Mulia et al is also shown.

**SUP. FIGURE 7 – ORIGINAL BLOTS**

\*signal from previous staining

\*\* aspecific

**FIG. 1A**

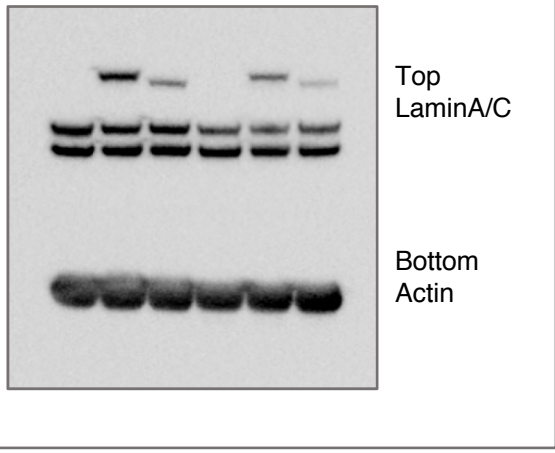

**FIG. 3A**

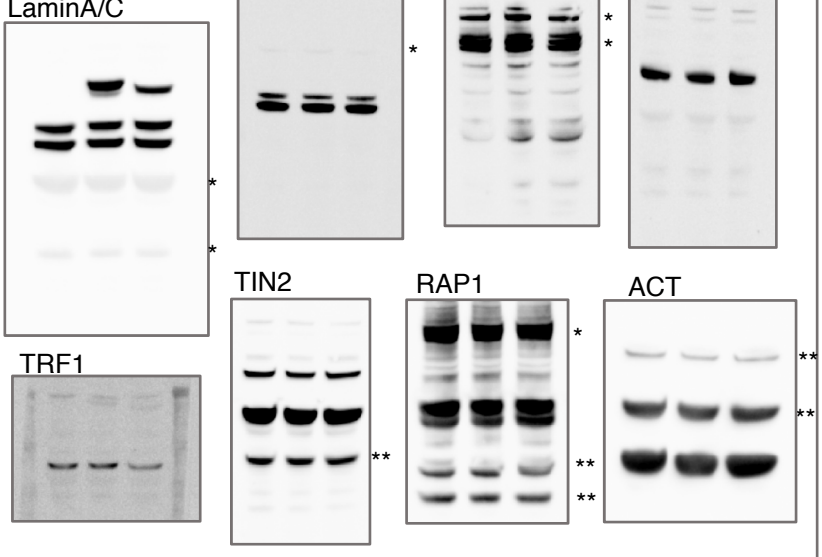

**FIG. 4F – merge with ladder is shown**

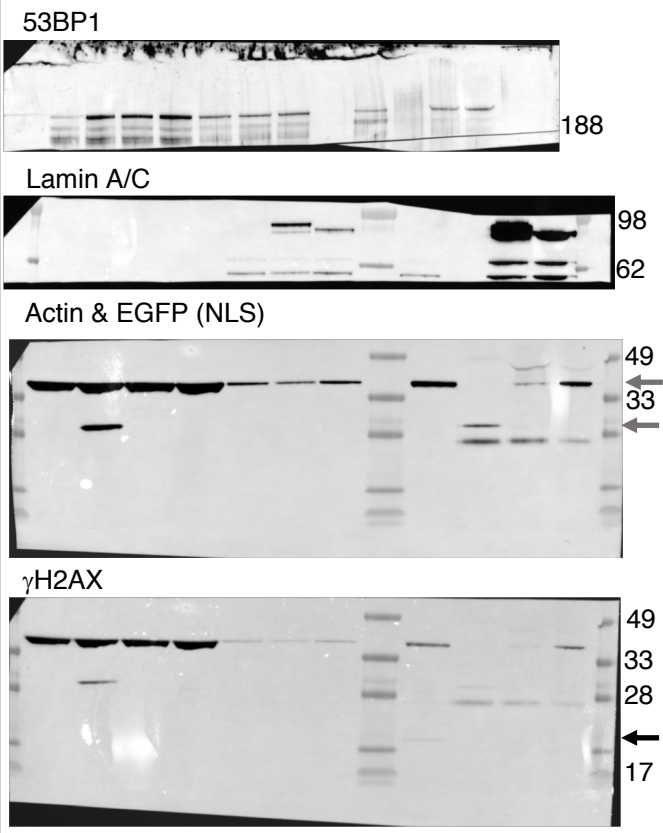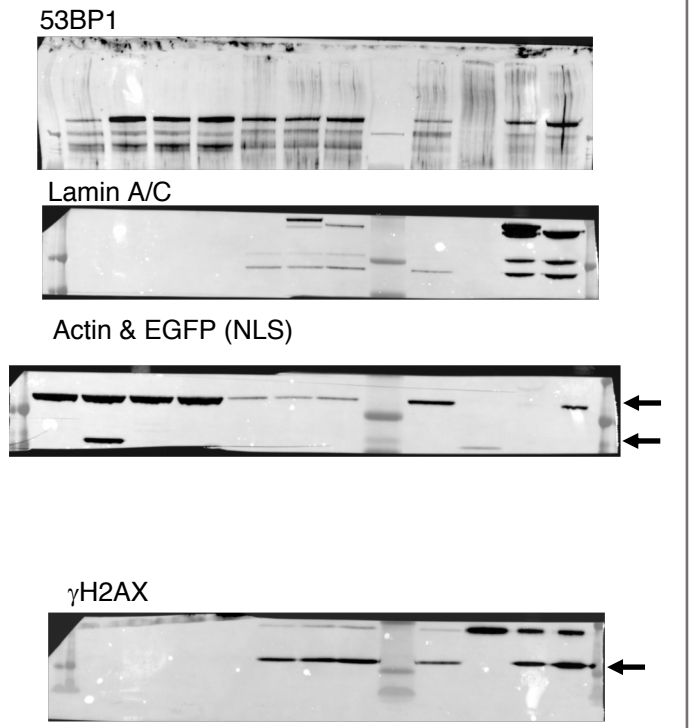

**FIG. 6C – merge with ladder is shown**

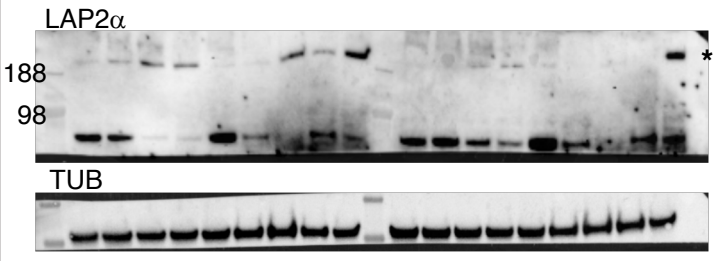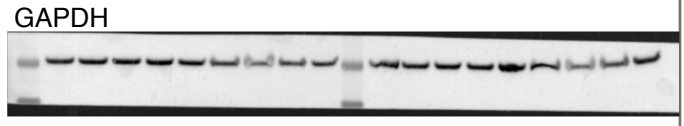

**SUP. FIGURE 8 – ORIGINAL BLOTS**

**FIG. S1B**

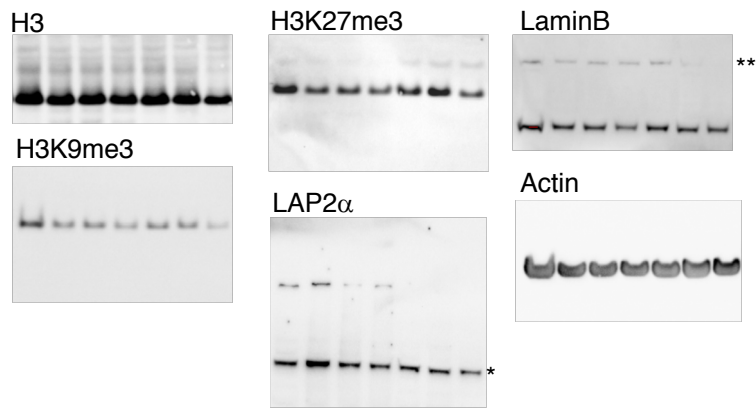

**FIG. S3A**

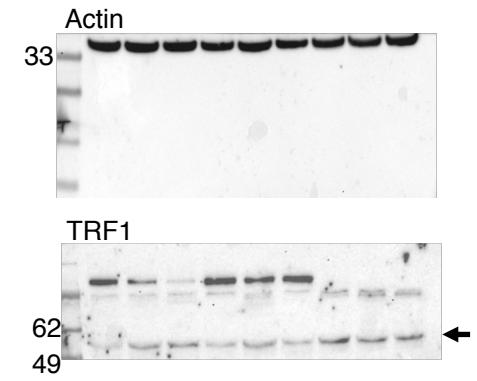

**FIG. S1E**

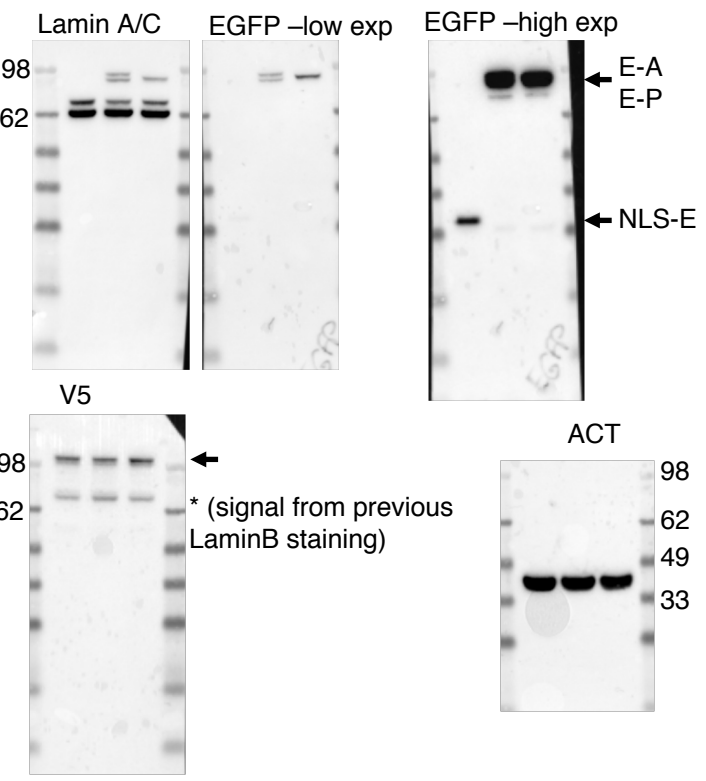

Supplement: 41598_2021_92631_MOESM1_ESM.pdf [file 41598_2021_92631_MOESM1_ESM.pdf]
